# Supplementary material for: A benzimidazole-derived fluorescent chemosensor for Cu(ii)-selective turn-off and Zn(ii)-selective ratiometric turn-on detection in aqueous solutions
Source: Royal Society of Chemistry journal article supplement (doi:10.1039/d3sd00020f), 2023-01-01
Supplement: d3sd00020f1.pdf [file d3sd00020f1.pdf]

Supporting Information

A benzimidazole-derived fluorescent chemosensor for Cu(II)-selective turn-off and Zn(II)-selective ratiometric turn-on detection in aqueous solution

Wan-Yu Zhu<sup>1</sup>, Kai Liu<sup>1\*</sup>, Xuan Zhang<sup>1,2\*</sup>

<sup>1</sup>Key Laboratory of Science and Technology of Eco-Textiles, Ministry of Education, College of Chemistry and Chemical Engineering, Donghua University, Shanghai 201620, China; <sup>2</sup>National Innovation Center of Advanced Dyeing & Finishing Technology, Tai'an, Shandong 271000, China;

\* Corresponding Author. E-mail address: kailiu@dhu.edu.cn (KL); xzhang@dhu.edu.cn (XZ)

**Table S1** The spectral data of BBMP in various solvents

| Compound                                                                                  | Solvent           | $\lambda_{\text{Abs}}$ (nm) | $\lambda_{\text{Flu}}$ (nm) | $\Phi_{\text{F}}$ |
|-------------------------------------------------------------------------------------------|-------------------|-----------------------------|-----------------------------|-------------------|
| 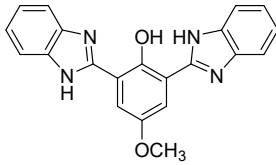<br>BBMP | DEE               | 296/372                     | 547                         | 0.677             |
|                                                                                           | CHCl <sub>3</sub> | 298/373                     | 548                         | 0.876             |
|                                                                                           | THF               | 298//372                    | 548                         | 0.730             |
|                                                                                           | DMSO              | 298/373                     | 546                         | 0.9900            |
|                                                                                           | DMF               | 298/373/437                 | 473 (sh.)/543               | 0.790             |
|                                                                                           | MeOH              | 296/372/425                 | 452/539                     | 0.689             |
|                                                                                           | NaOH              | 294/407                     | 491                         | 0.818             |

**Table S2** Comparison of the sensing performance with previously reported Cu<sup>2+</sup>/Zn<sup>2+</sup> sensors

| Solution media              | Ratiometric detection available | Linear range ( $\mu\text{M}$ )                           | Detection limit ( $\mu\text{M}$ )                    | Reference |
|-----------------------------|---------------------------------|----------------------------------------------------------|------------------------------------------------------|-----------|
| DMSO/H <sub>2</sub> O (4:1) | no                              | Cu <sup>2+</sup> : 0-15<br>Zn <sup>2+</sup> : 0-20       | Cu <sup>2+</sup> : 0.023<br>Zn <sup>2+</sup> : 0.068 | 9         |
| THF/H <sub>2</sub> O (5:95) | yes                             | Cu <sup>2+</sup> : 0-10<br>Zn <sup>2+</sup> : 0-10       | Cu <sup>2+</sup> : 0.23<br>Zn <sup>2+</sup> : 1.8    | 10        |
| DMSO                        | no                              | Cu <sup>2+</sup> : no data<br>Zn <sup>2+</sup> : no data | Cu <sup>2+</sup> : 5.25<br>Zn <sup>2+</sup> : 29.3   | 11        |
| DMSO/H <sub>2</sub> O (4:1) | no                              | Cu <sup>2+</sup> : 1-10<br>Zn <sup>2+</sup> : 2-20       | Cu <sup>2+</sup> : 1.46<br>Zn <sup>2+</sup> : 0.035  | 16        |
| DMF                         | no                              | Cu <sup>2+</sup> : no data<br>Zn <sup>2+</sup> : no data | Cu <sup>2+</sup> : 0.18<br>Zn <sup>2+</sup> : 0.43   | 18        |
| MeCN                        | no                              | Cu <sup>2+</sup> : no data<br>Zn <sup>2+</sup> : no data | Cu <sup>2+</sup> : 1.54<br>Zn <sup>2+</sup> : 3.3    | 19        |
| DMSO/H <sub>2</sub> O (9:1) | yes                             | Cu <sup>2+</sup> : no data<br>Zn <sup>2+</sup> : no data | Cu <sup>2+</sup> : 0.001<br>Zn <sup>2+</sup> : 0.94  | 27        |
| THF/H <sub>2</sub> O (7:3)  | yes                             | Cu <sup>2+</sup> : 0-5<br>Zn <sup>2+</sup> : 0-10        | Cu <sup>2+</sup> : 0.16<br>Zn <sup>2+</sup> : 0.1    | This work |

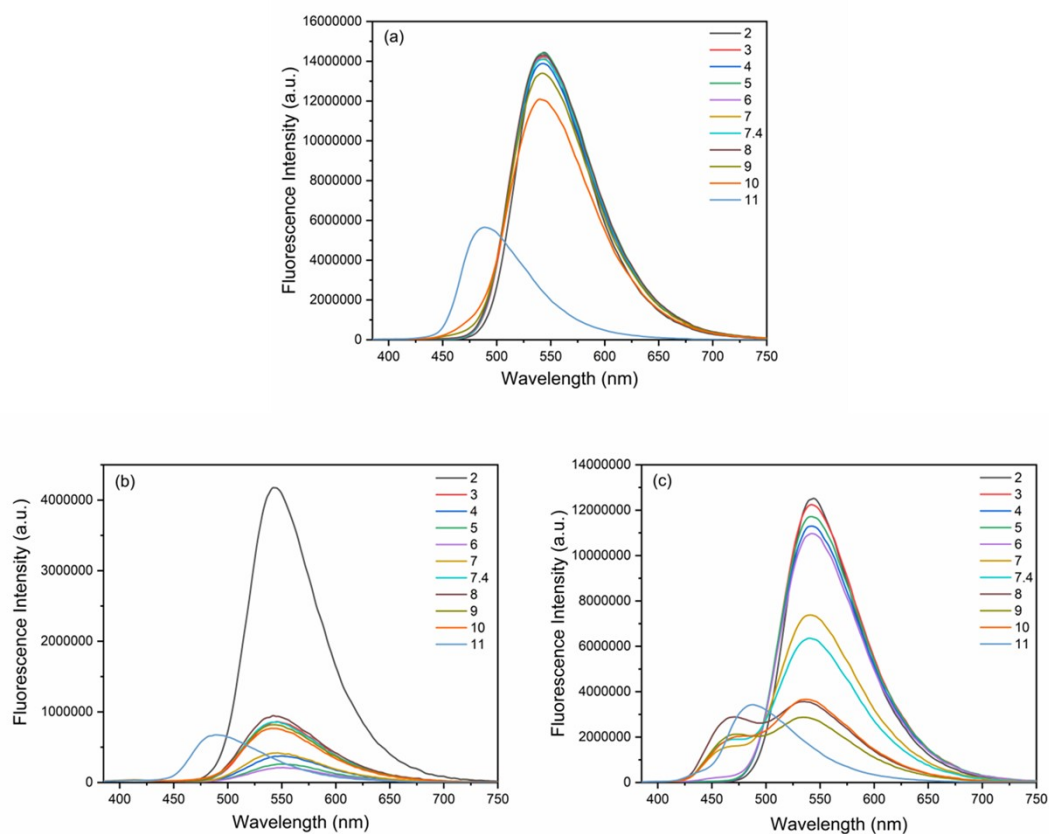

**Fig. S1** Fluorescence spectra of probe BBMP (a), BBMP with 1 equiv.  $\text{Cu}^{2+}$  (b) and BBMP with 1 equiv.  $\text{Zn}^{2+}$  (c) at different pH values in Tris-HCl buffer.  $\lambda_{\text{ex}} = 370$  nm.

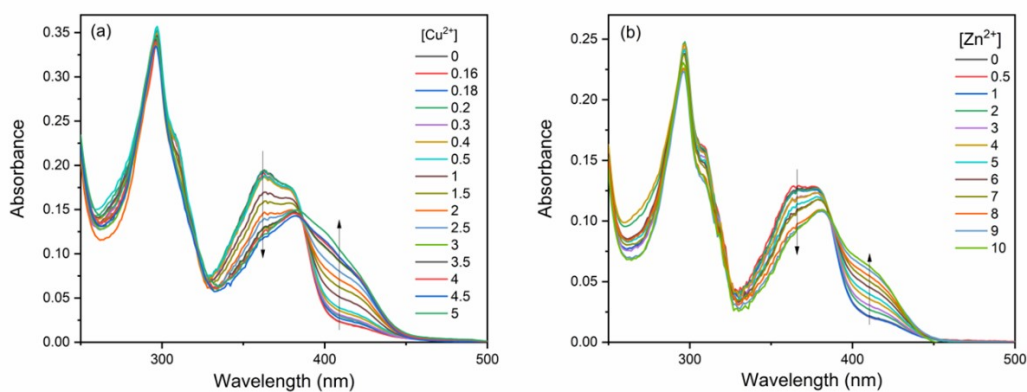

**Fig. S2** UV-vis absorption titration spectra of BBMP (10  $\mu\text{M}$ ) upon addition of different concentration of  $\text{Cu}^{2+}$  (a) and  $\text{Zn}^{2+}$  (b) in aqueous THF solution (7:3 (v/v) THF/Tris-HCl, pH = 7.4).

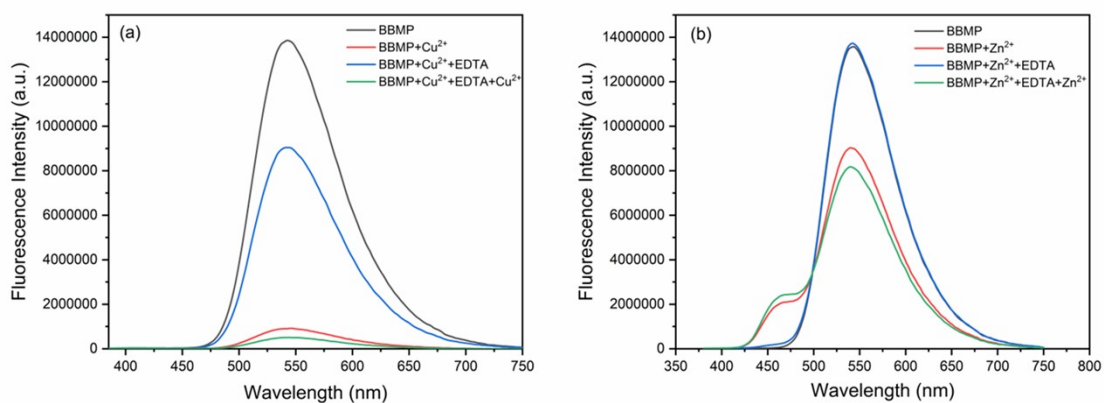

**Fig. S3** Fluorescence intensity of BBMP (10  $\mu$ M) upon the alternate addition of Cu<sup>2+</sup> (a), Zn<sup>2+</sup> (b) and EDTA in aqueous THF solution (7:3 (v/v) THF/Tris-HCl, pH = 7.4).

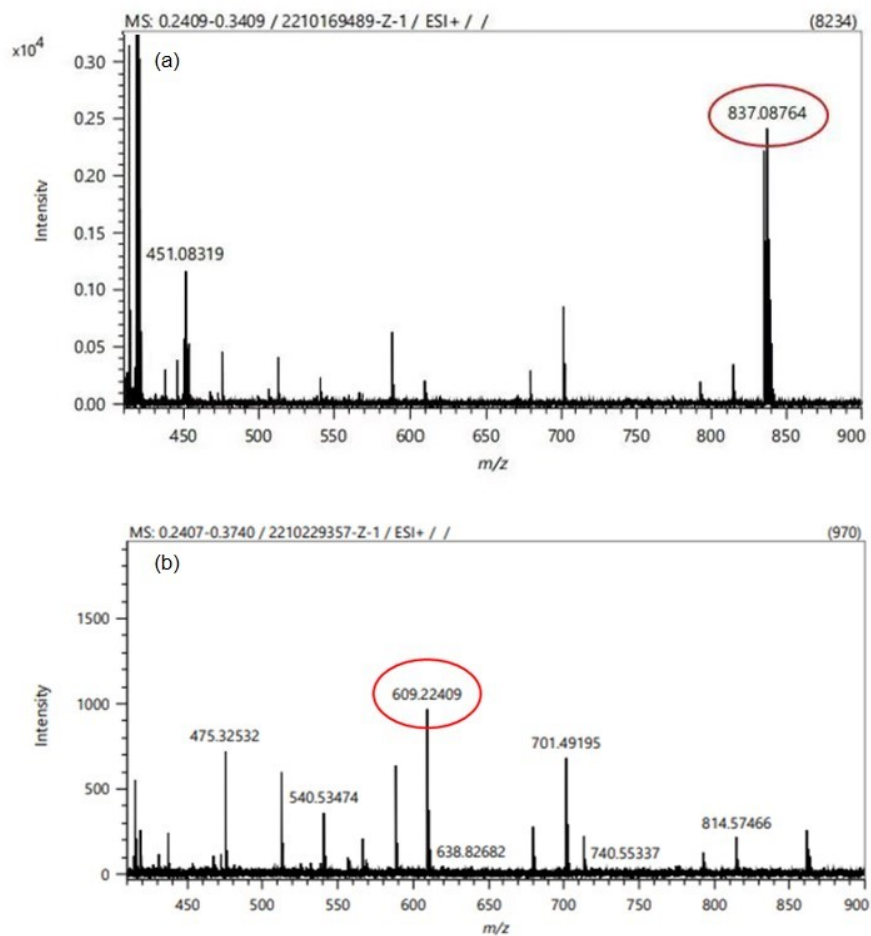

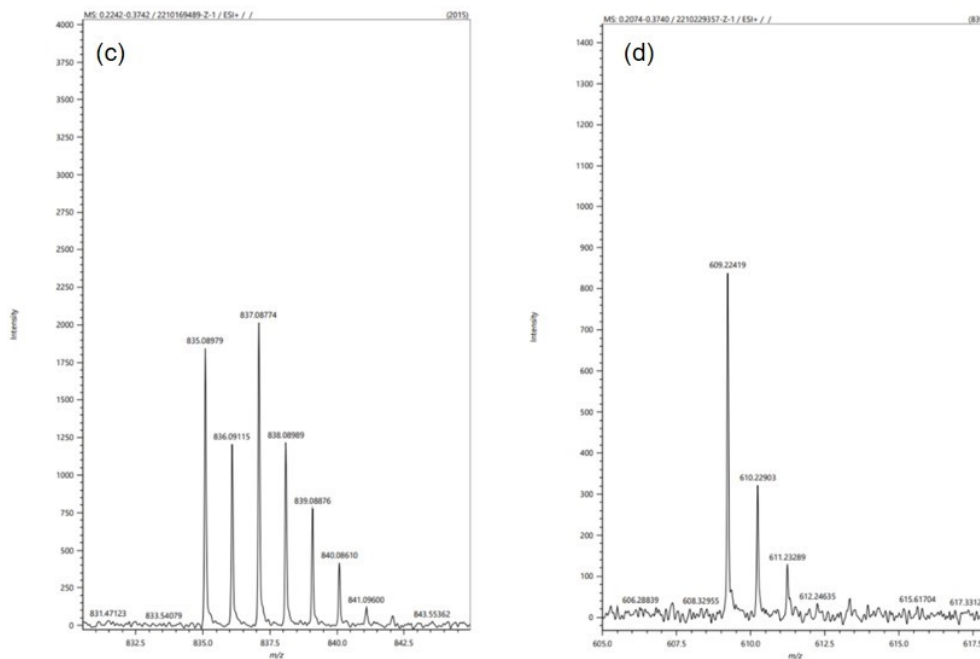

**Fig. S4.** ESI-MS spectra of the mixture of BBMP with  $\text{Cu}^{2+}$  (a) and  $\text{Zn}^{2+}$  (b) in MeOH, where the target peaks associated with complexes were labeled with red circle. ESI-MS spectra of near the target peak of the mixture of BBMP with  $\text{Cu}^{2+}$  (c) and  $\text{Zn}^{2+}$  (d).

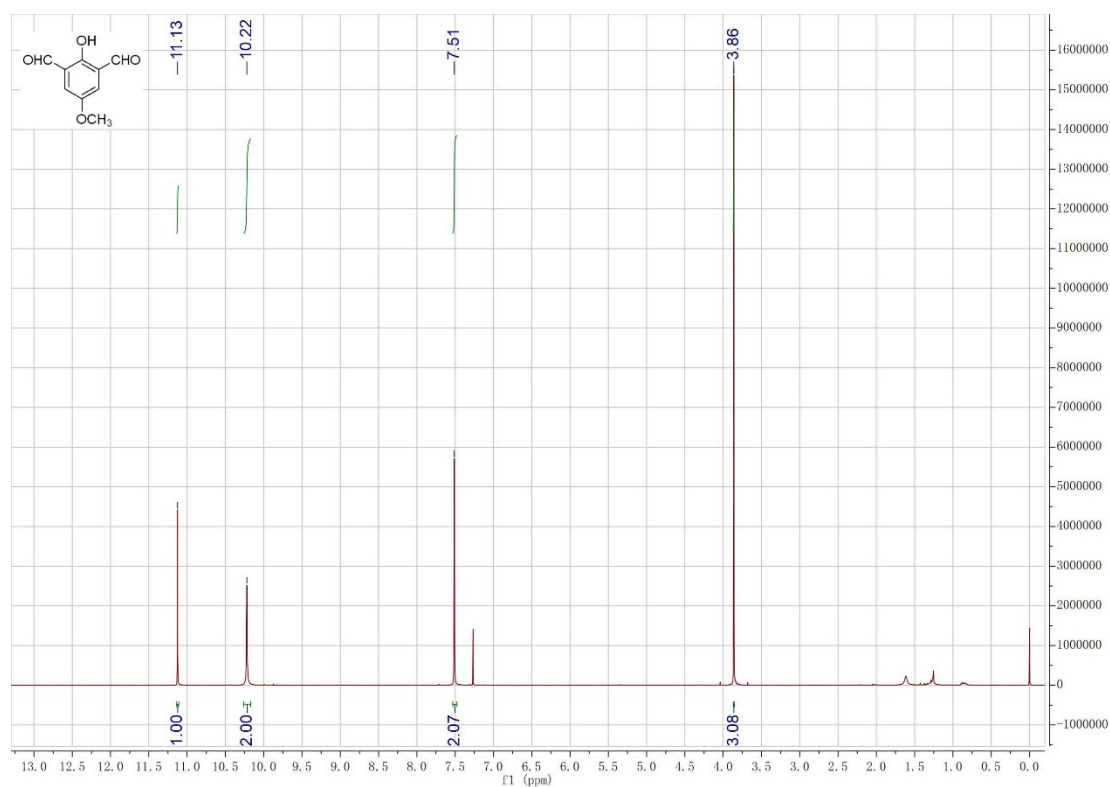

**Fig. S5.**  $^1\text{H}$  NMR spectra of 2,6-diformyl-4-methoxyphenol.

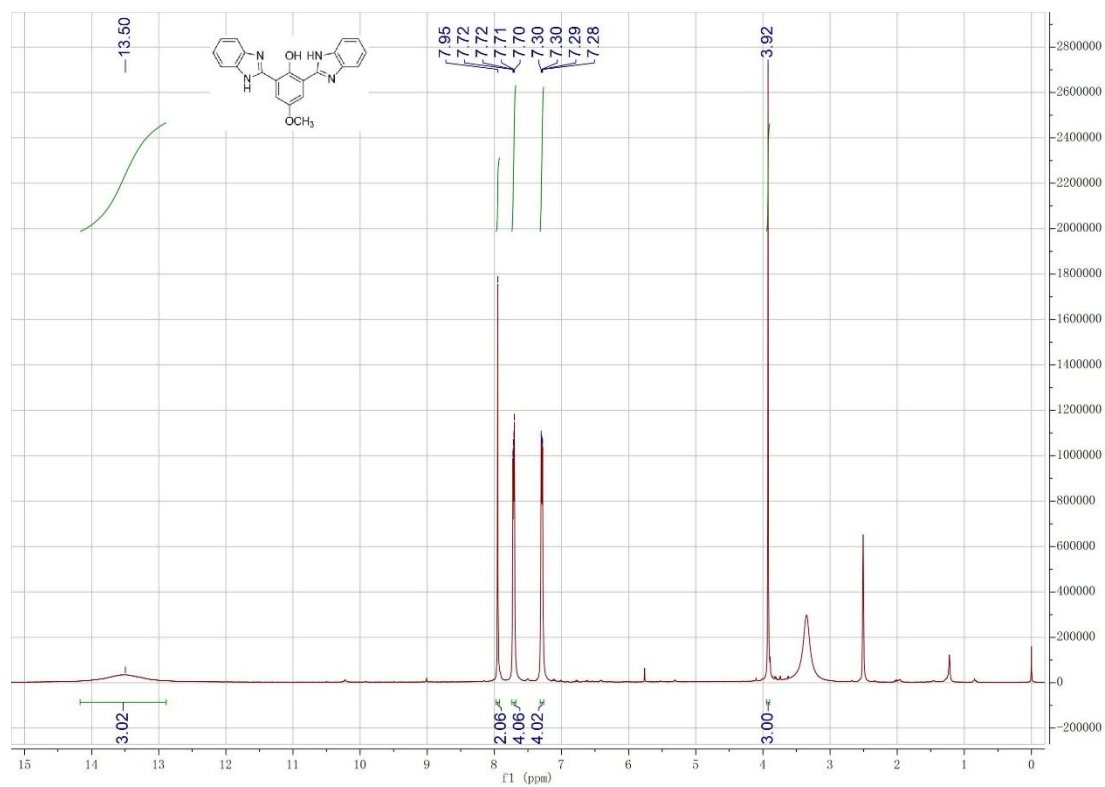

**Fig. S6.**  $^1\text{H}$  NMR spectra of BBMP.

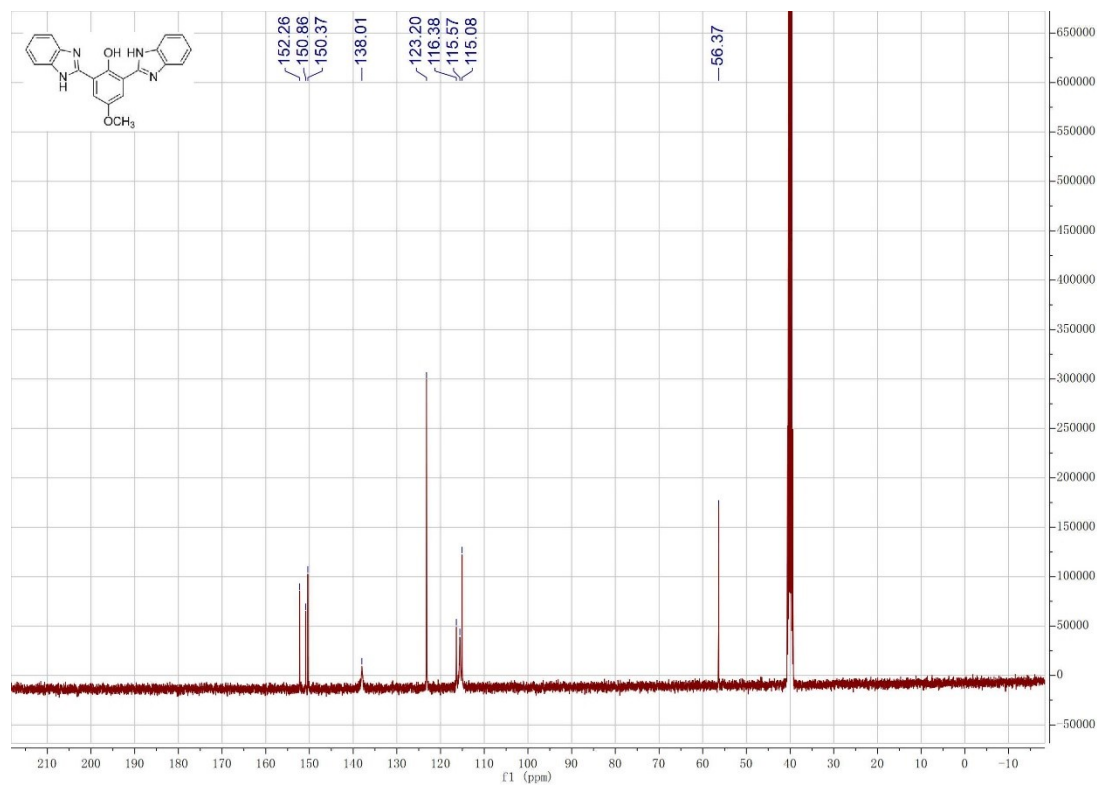

**Fig. S7.**  $^{13}\text{C}$  NMR spectra of BBMP.

**Acquisition Parameter**

|             |            |                      |          |                  |           |
|-------------|------------|----------------------|----------|------------------|-----------|
| Source Type | ESI        | Ion Polarity         | Positive | Set Nebulizer    | 1.0 Bar   |
| Focus       | Not active |                      |          | Set Dry Heater   | 250 °C    |
| Scan Begin  | 100 m/z    | Set Capillary        | 4000 V   | Set Dry Gas      | 4.0 l/min |
| Scan End    | 1000 m/z   | Set End Plate Offset | -500 V   | Set Divert Valve | Waste     |

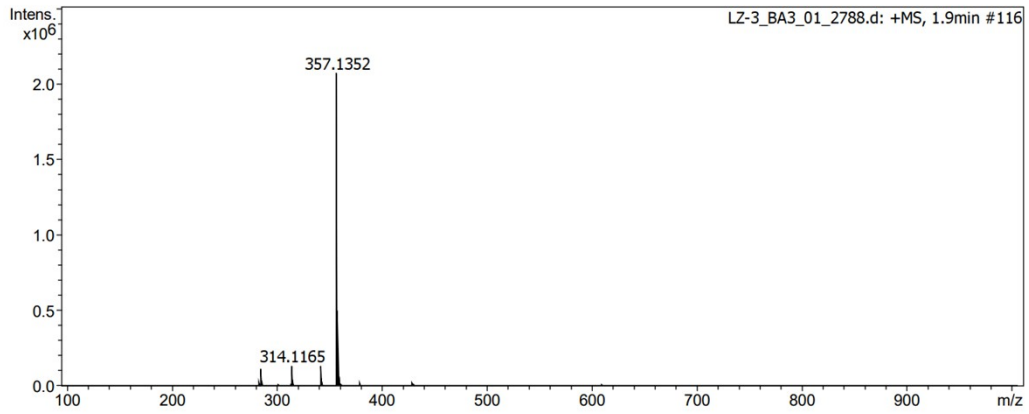

**Fig. S8.** HRMS spectra of BBMP.
